# Supplementary material
Source: publisher figshare collection journal article supplement (https://springernature.figshare.com/ndownloader/files/15446705)

**Supplementary Table 1:** Kappa agreement for outcome assessors per operationalised checklist question; Question Number, operationalised checklist number on IICARus platform; CI, confidence interval; Kappa Estimate, unweighted Cohen's kappa; NA for ARRIVE Item indicates that the information required for this questions is not a requirement of the ARRIVE guidelines

| Question Number | ARRIVE Item | Lower CI | Upper CI | Kappa Estimate | IICARUs Question                                                                                                                        |
|-----------------|-------------|----------|----------|----------------|-----------------------------------------------------------------------------------------------------------------------------------------|
| 1.1             | 1           | 0.862    | 0.929    | 0.896          | Is the species of animal model studied reported in the title?                                                                           |
| 1.2             | 1           | 0.094    | 0.388    | 0.241          | Is the biological mechanism, disease or pathophysiology studied, reported in the title?                                                 |
| 1.3             | 1           | 0.213    | 0.345    | 0.279          | Is the intervention or exposure reported in the title?                                                                                  |
| 2.1             | 2           | 0.11     | 0.297    | 0.204          | Is the objective or hypothesis given in the abstract?                                                                                   |
| 2.2             | 2           | -0.105   | 0.318    | 0.106          | Is the biological mechanism, disease or pathophysiology studied, reported in the abstract?                                              |
| 2.3             | 2           | 0.231    | 0.402    | 0.317          | Is the intervention or exposure reported in the abstract?                                                                               |
| 2.4             | 2           | 0.553    | 0.73     | 0.642          | Is the species or strain studied stated anywhere in the abstract?                                                                       |
| 3.1             | 3           | -0.009   | 0        | -0.004         | Do the authors refer to previous work in the literature relating to this field?                                                         |
| 3.2             | 3           | 0.447    | 0.581    | 0.514          | Is a statement reported about the rationale for using that animal species or animal disease model to address the scientific objectives? |
| 3.3             | 3           | 0.282    | 0.433    | 0.358          | If applicable to the research question, is there a statement describing the relevance of the study to human biology?                    |
| 4.1             | 4           | 0.043    | 0.231    | 0.137          | Is the objective or hypothesis given in the introduction?                                                                               |
| 5.1             | 5           | 0.043    | 0.458    | 0.25           | Does the manuscript include an explicit statement of approval?                                                                          |
| 5.2             | 5           | 0.127    | 0.403    | 0.265          | Does the manuscript identify the committee(s) approving the study protocol?                                                             |
| 5.3             | 5           | 0.707    | 0.817    | 0.762          | Does the manuscript name the international, national or institutional guidelines followed?                                              |
| 5.4             | NA          | 0.812    | 0.893    | 0.853          | Does the manuscript report a protocol / permit number?                                                                                  |
| 6.1             | 6           | 0.154    | 0.308    | 0.231          | Are the total number of experimental and control groups reported?                                                                       |
| 6.2             | 6           | 0.034    | 0.203    | 0.119          | Is the experimental unit stated?                                                                                                        |
| 6.3             | 6           | 0.08     | 0.232    | 0.156          | If the experimental unit is not stated is it clear what it is?                                                                          |
| 6.4             | 6           | 0.633    | 0.735    | 0.684          | Is randomisation reported to assign animals to experimental group?                                                                      |
| 6.5             | 6           | 0.509    | 0.623    | 0.566          | If randomisation was NOT done, does the paper mention randomisation at all?                                                             |
| 6.6             | 6           | 0.663    | 0.791    | 0.727          | Are assessors blinded for at least one of the outcomes measured?                                                                        |
| 6.7             | 6           | 0.515    | 0.662    | 0.588          | Does the manuscript include a statement about blinding even if no blinding was done?                                                    |
| 7.1.8           | NA          | 0.529    | 0.644    | 0.587          | If a surgical procedure was carried out was it part of model induction?                                                                 |
| 7.1.1           | 7           | 0.421    | 0.529    | 0.475          | Vehicle(s) reported?                                                                                                                    |
| 7.1.2           | 7           | 0.313    | 0.426    | 0.369          | Vehicle volume(s) reported?                                                                                                             |
| 7.1.3           | 7           | 0.576    | 0.696    | 0.636          | Intervention/exposure dose(s) reported?                                                                                                 |

|       |    |       |       |       |                                                                                                                                                                                                            |
|-------|----|-------|-------|-------|------------------------------------------------------------------------------------------------------------------------------------------------------------------------------------------------------------|
| 7.1.4 | 7  | 0.601 | 0.716 | 0.658 | Route(s) of administration reported?                                                                                                                                                                       |
| 7.1.5 | 7  | 0.491 | 0.606 | 0.549 | Site(s) of administration reported?                                                                                                                                                                        |
| 7.1.6 | 7  | 0.386 | 0.508 | 0.447 | Frequency of administration reported?                                                                                                                                                                      |
| 7.1.7 | 7  | 0.448 | 0.563 | 0.505 | Supplier(s) reported?                                                                                                                                                                                      |
| 7.1.9 | NA | 0.516 | 0.633 | 0.575 | If a surgical procedure was carried out was it part of either treatment or outcome measurement(s)?                                                                                                         |
| 7.2.1 | 7  | 0.257 | 0.378 | 0.317 | Does the manuscript describe when the intervention/exposure group procedures were carried out?                                                                                                             |
| 7.2.2 | 7  | 0.244 | 0.38  | 0.312 | Does the manuscript describe where the intervention/exposure group procedures were carried out?                                                                                                            |
| 7.2.3 | 7  | 0.166 | 0.295 | 0.231 | Is any rationale for the use of the intervention/exposure group reported?                                                                                                                                  |
| 7.3.1 | 7  | 0.268 | 0.401 | 0.335 | Is the control reported?                                                                                                                                                                                   |
| 7.3.2 | 7  | 0.423 | 0.53  | 0.477 | Is the control dose or volume reported?                                                                                                                                                                    |
| 7.3.3 | 7  | 0.483 | 0.588 | 0.535 | Is the control route reported?                                                                                                                                                                             |
| 7.3.4 | 7  | 0.436 | 0.543 | 0.489 | Is the control site of administration reported?                                                                                                                                                            |
| 7.3.5 | 7  | 0.395 | 0.503 | 0.449 | Is the frequency of administration reported?                                                                                                                                                               |
| 7.4.1 | 7  | 0.314 | 0.426 | 0.37  | Does the manuscript describe when any control /comparator interventions were carried out?                                                                                                                  |
| 7.4.2 | 7  | 0.359 | 0.485 | 0.422 | Does the manuscript describe where any control/comparator interventions were carried out?                                                                                                                  |
| 7.4.3 | 7  | 0.3   | 0.432 | 0.366 | Is any rationale for the use of the control/comparator group reported?                                                                                                                                     |
| 7.3.6 | 7  | 0.35  | 0.54  | 0.445 | If a control surgical procedure (sham) was carried out, do they describe the methods used?                                                                                                                 |
| 7.5.1 | 7  | 0.581 | 0.692 | 0.636 | Is surgical anaesthesia use reported?                                                                                                                                                                      |
| 7.5.2 | 7  | 0.602 | 0.71  | 0.656 | Is the anaesthesia route reported?                                                                                                                                                                         |
| 7.5.3 | 7  | 0.658 | 0.766 | 0.712 | Is the anaesthetic reported?                                                                                                                                                                               |
| 7.5.4 | 7  | 0.623 | 0.731 | 0.677 | Is the anaesthesia dose reported?                                                                                                                                                                          |
| 7.5.7 | 7  | 0.618 | 0.729 | 0.673 | Is the monitoring of at least one physiological parameters during surgical anaesthesia reported?                                                                                                           |
| 7.6.1 | 7  | 0.633 | 0.771 | 0.702 | Is euthanasia, sacrifice etc. reported?                                                                                                                                                                    |
| 7.6.2 | 7  | 0.611 | 0.712 | 0.662 | Is the method of euthanasia reported?                                                                                                                                                                      |
| 8.1   | 7  | 0     | 0     | 0     | Is the animal species reported?                                                                                                                                                                            |
| 8.2   | 7  | 0.219 | 0.518 | 0.368 | Is the strain of the animals reported?                                                                                                                                                                     |
| 8.3   | 7  | 0.64  | 0.754 | 0.697 | Is the sex of the animals reported?                                                                                                                                                                        |
| 8.4   | 7  | 0.62  | 0.713 | 0.666 | Is the age of the animals reported?                                                                                                                                                                        |
| 8.5   | 7  | 0.645 | 0.746 | 0.695 | Is the weight of the animals reported?                                                                                                                                                                     |
| 8.6   | 8  | 0.472 | 0.575 | 0.524 | For studies using transgenic animals, do the authors report: 1) The genetic modification status (knockout, overexpression etc.), 2) The genotype (homozygous, heterozygous) and 3) The manipulated gene/s? |
| 8.7   | 14 | 0.07  | 0.406 | 0.238 | Are the animals used in the study reported to be drug or test naive prior to treatment or testing?                                                                                                         |
| 8.8   | 8  | 0.586 | 0.712 | 0.649 | Is the source/supplier of the animals reported?                                                                                                                                                            |
| 8.9   | 14 | 0.345 | 0.59  | 0.467 | Is the health status of the animals reported?                                                                                                                                                              |
| 9.1.1 | 9  | 0.634 | 0.767 | 0.7   | Is the biosecurity level of the facility reported?                                                                                                                                                         |
| 9.1.2 | 9  | 0.609 | 0.736 | 0.672 | Is the type of cage or housing reported?                                                                                                                                                                   |
| 9.1.3 | 9  | 0.704 | 0.845 | 0.774 | Is the bedding material reported?                                                                                                                                                                          |

|       |    |        |        |        |                                                                                                                                |
|-------|----|--------|--------|--------|--------------------------------------------------------------------------------------------------------------------------------|
| 9.1.4 | 9  | 0.735  | 0.842  | 0.789  | Is the number of cage companions reported?                                                                                     |
| 9.2.2 | 9  | 0.855  | 0.923  | 0.889  | Are the light/dark cycle conditions reported?                                                                                  |
| 9.2.3 | 9  | 0.788  | 0.879  | 0.833  | Is the temperature reported?                                                                                                   |
| 9.2.4 | 9  | 0.587  | 0.806  | 0.696  | For experiments involving fish, is the quality of the water reported?                                                          |
| 9.2.1 | 9  | 0.708  | 0.903  | 0.806  | For experiments involving fish, are the tank dimensions or materials reported?                                                 |
| 9.2.5 | 9  | 0.711  | 0.811  | 0.761  | Is the type of food provided reported?                                                                                         |
| 9.2.6 | 9  | 0.776  | 0.86   | 0.818  | Are the conditions around access to food reported?                                                                             |
| 9.2.7 | 9  | 0.802  | 0.879  | 0.84   | Are the conditions around access to drinking water reported?                                                                   |
| 9.2.8 | 9  | 0.488  | 0.728  | 0.608  | Is any environmental enrichment reported?                                                                                      |
| 9.3.1 | 9  | 0.401  | 0.564  | 0.482  | Have they reported any welfare assessment or intervention before, during, or after the experiment?                             |
| 10.1  | 10 | 0.496  | 0.622  | 0.559  | Is the total number of animals used in the study reported?                                                                     |
| 10.2  | 10 | 0.396  | 0.506  | 0.451  | Is the number of animals in each experimental group reported?                                                                  |
| 10.3  | 10 | 0.534  | 0.776  | 0.655  | Is a sample size calculation reported?                                                                                         |
| 10.4  | 10 | 0.036  | 0.199  | 0.117  | Is the basis for the sample size calculations (effect size, variance, power) presented? If response to 10.3 is "No", select NA |
| 10.5  | 10 | 0.3    | 0.431  | 0.365  | Is the number of independent replications of experiments reported?                                                             |
| 11.1  | NA | 0.094  | 0.309  | 0.202  | Is allocation concealment reported?                                                                                            |
| 11.2  | 11 | 0.178  | 0.349  | 0.264  | Are the methods of allocation to group (i.e. randomisation, matching) described?                                               |
| 11.4  | 11 | 0.288  | 0.449  | 0.369  | Is the order in which animals receive treatments defined?                                                                      |
| 11.5  | 11 | 0.06   | 0.24   | 0.15   | Is the order in which outcomes are assessed in different animals reported?                                                     |
| 12.1  | 12 | -0.043 | 0.114  | 0.036  | Are reported outcomes identified as primary or secondary?                                                                      |
| 12.2  | NA | -0.061 | 0.137  | 0.038  | Is at least one outcome measure described?                                                                                     |
| 13.1  | 13 | 0.242  | 0.432  | 0.337  | Is at least one outcome measure associated with at least one statistical test?                                                 |
| 13.2  | 13 | -0.101 | 0.043  | -0.029 | Is the unit of analysis for at least one test explicitly specified?                                                            |
| 13.3  | 13 | 0.23   | 0.421  | 0.325  | Does the publication include a method to assess whether the data meet the assumptions of the statistical tests used?           |
| 14.1  | 15 | 0.218  | 0.331  | 0.274  | Is the number of animals for each group reported for each analysis?                                                            |
| 14.2  | 15 | 0.354  | 0.553  | 0.454  | Are the reasons for the exclusion of animals (for any outcome) given?                                                          |
| 15.1  | 16 | 0.212  | 0.413  | 0.312  | Are findings presented with a measure of precision?                                                                            |
| 15.2  | 16 | 0.379  | 0.512  | 0.446  | Is the measure of precision defined?                                                                                           |
| 16.1  | 17 | 0.483  | 0.651  | 0.567  | Is there a statement indicating whether or not adverse events occurred for at least one experimental group?                    |
| 16.2  | 17 | -0.085 | 0.202  | 0.059  | Does the paper describe any refinements to the experimental design to reduce adverse events?                                   |
| 17.1  | 18 | -0.017 | -0.005 | -0.011 | Are the results interpreted in the context of the study hypothesis or objectives?                                              |

|       |    |        |        |        |                                                                                                                                                                          |
|-------|----|--------|--------|--------|--------------------------------------------------------------------------------------------------------------------------------------------------------------------------|
| 17.2  | 18 | -0.02  | -0.004 | -0.012 | Are the results interpreted in the context of other studies in the literature?                                                                                           |
| 17.3  | 18 | 0.482  | 0.625  | 0.554  | Are the limitations of the study design and/or execution discussed?                                                                                                      |
| 17.4  | 18 | 0.054  | 0.339  | 0.197  | Are any implications of the experimental methods or findings for the for the replacement, refinement or reduction (the 3Rs) of the use of animals in research discussed? |
| 18.1  | 19 | 0.316  | 0.474  | 0.395  | Is there a statement about how the findings of this study might translate to other species or systems, such as any relevance to human biology?                           |
| 19.1  | 20 | 0.284  | 0.568  | 0.426  | Do the authors report funding source(s)?                                                                                                                                 |
| 19.2  | 20 | 0.681  | 0.794  | 0.738  | Do the authors include the grant number (grant #)?                                                                                                                       |
| 19.3  | 20 | 0.85   | 0.919  | 0.885  | Has the role of the funders been reported?                                                                                                                               |
| 19.4  | NA | 0.006  | 0.277  | 0.141  | Is there a statement of competing or conflicting interests?                                                                                                              |
| 2.5   | 2  | 0.254  | 0.43   | 0.342  | Are the key methods of the study briefly summarised?                                                                                                                     |
| 2.6   | 2  | -0.017 | -0.004 | -0.011 | Are the principal findings of the study briefly summarised?                                                                                                              |
| 2.7   | 2  | 0.196  | 0.591  | 0.394  | Are the conclusions of the study briefly summarised?                                                                                                                     |
| 7.5.5 | 7  | 0.563  | 0.672  | 0.617  | Are the methods used for surgical procedures clearly described?                                                                                                          |
| 7.5.6 | 7  | 0.522  | 0.639  | 0.581  | Are the suppliers for any specialist surgical equipment reported?                                                                                                        |
| 7.5.8 | 7  | 0.602  | 0.716  | 0.659  | Is the use of an analgesic, or a reason why analgesic was not used, reported?                                                                                            |
| 0.2   | NA | 0.537  | 0.735  | 0.636  | Does the manuscript include human study?                                                                                                                                 |

**Supplementary Figure 1:** Distribution of kappa agreement between outcome assessors for operationalised checklist questions

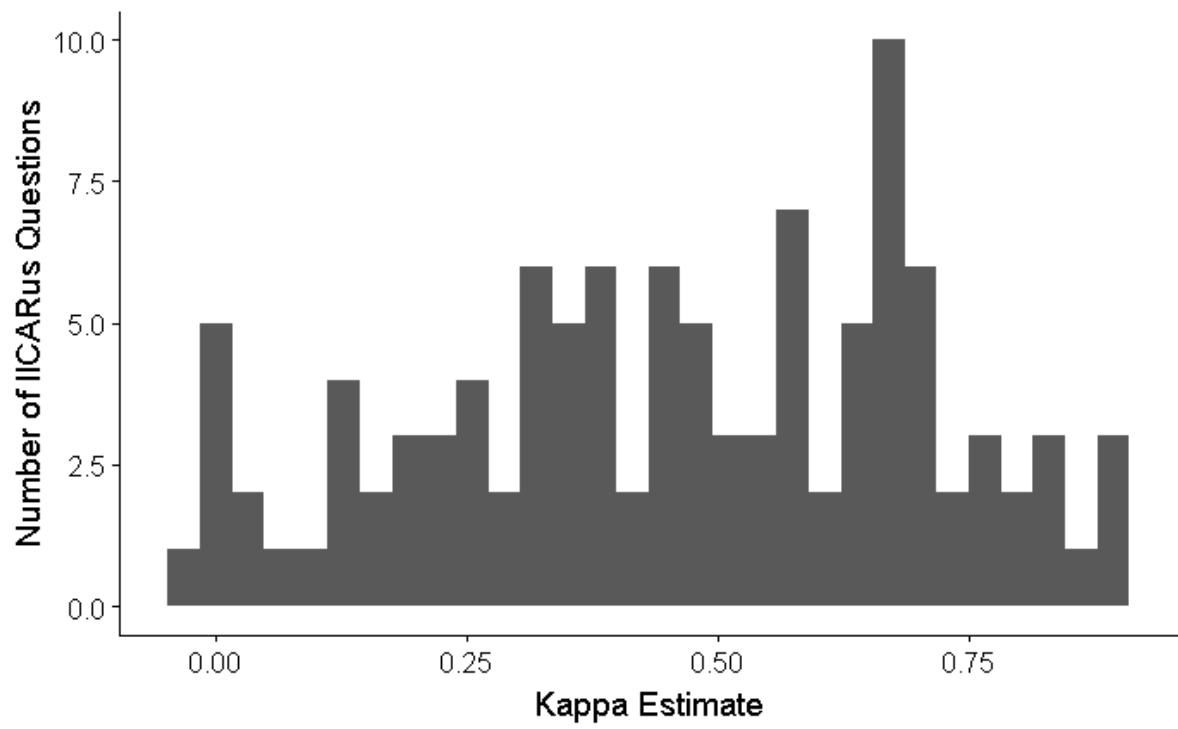

Supplement: Supplementary file [file 15446705]
